# Supplementary material for: Kinetic study of catalytic formic acid dehydrogenation by in situ UV-vis spectroscopy
Source: Royal Society of Chemistry journal article supplement (doi:10.1039/d4se01328j), 2024-11-12
Supplement: d4se01328j1.pdf [file d4se01328j1.pdf]

## Supporting Information

### **Kinetic Study of Catalytic Formic Acid Dehydrogenation by in Situ UV-Vis Spectroscopy**

Seo Ono,<sup>a,b</sup> Risheng Li,<sup>a,b</sup> Chieko Suzuki,<sup>c</sup> Akira Yamamoto,<sup>d</sup> Hisao Yoshida,<sup>d</sup> Hajime Kawanami,<sup>a,b</sup> Ryoichi Kanega<sup>\*c</sup>

<sup>a</sup>Research Center for Catalytic Chemistry, National Institute of Advanced Industrial Science and Technology, Tsukuba Central 5, 1-1-1 Higashi, Tsukuba, Ibaraki, 305-8565, Japan

<sup>b</sup>Graduate School of Pure and Applied Science Interdisciplinary, University of Tsukuba, Tsukuba, Ibaraki, 305-8577, Japan

<sup>c</sup>Research Institute for Energy Conservation, National Institute of Advanced Industrial Science and Technology, Tsukuba Central 5, 1-1-1 Higashi, Tsukuba, Ibaraki, 305-8565, Japan

<sup>d</sup>Department of Interdisciplinary Environment, Graduate School of Human and Environmental Studies, Kyoto University, Yoshida Nihonmatsu-cho, Sakyo-ku, Kyoto 606-8501, Japan

\*Correspondence to: r-kanega@aist.go.jp

Table of Contents

Figures S1 to S34

S2-S18

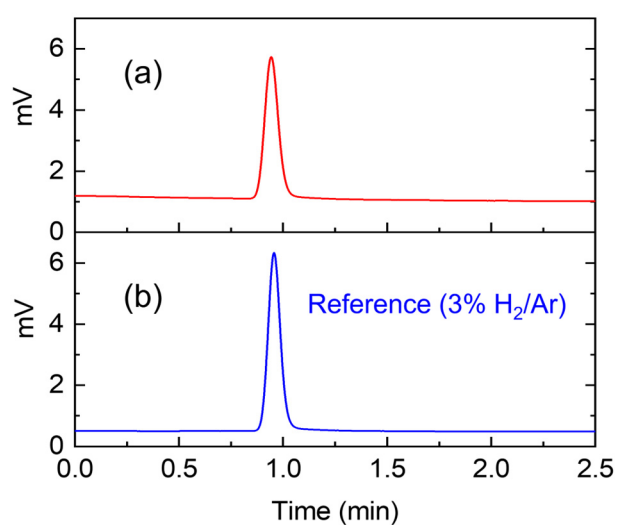

**Figure S1.** GC-TCD chromatographs of (a) gas product after addition of  $\text{H}_2\text{SO}_4$  and (b) reference (3%  $\text{H}_2/\text{Ar}$ , 0.5 mL).

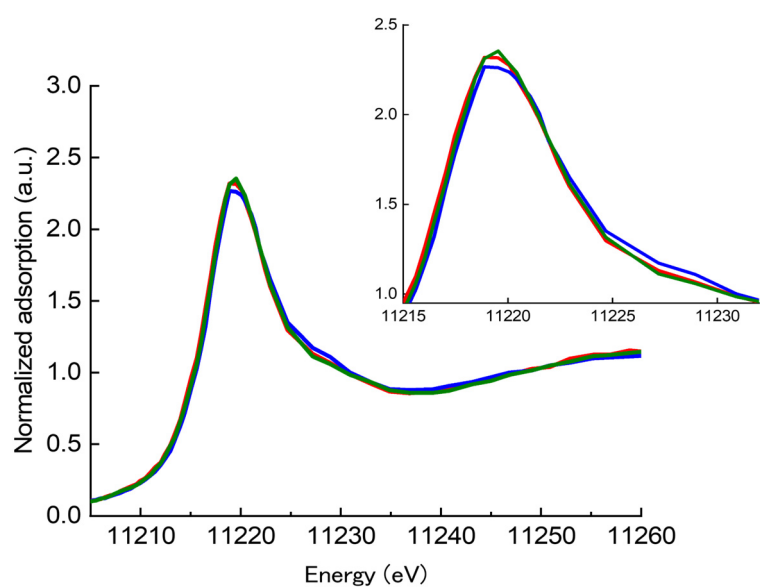

**Figure S2.** Normalized XANES spectra of **Ir3** solution (red line), **Ir3**/ $\text{HCO}_2\text{K}$  solution (blue line), **Ir3**/ $\text{HCO}_2\text{K}/\text{H}_2\text{SO}_4$  solution (green line).

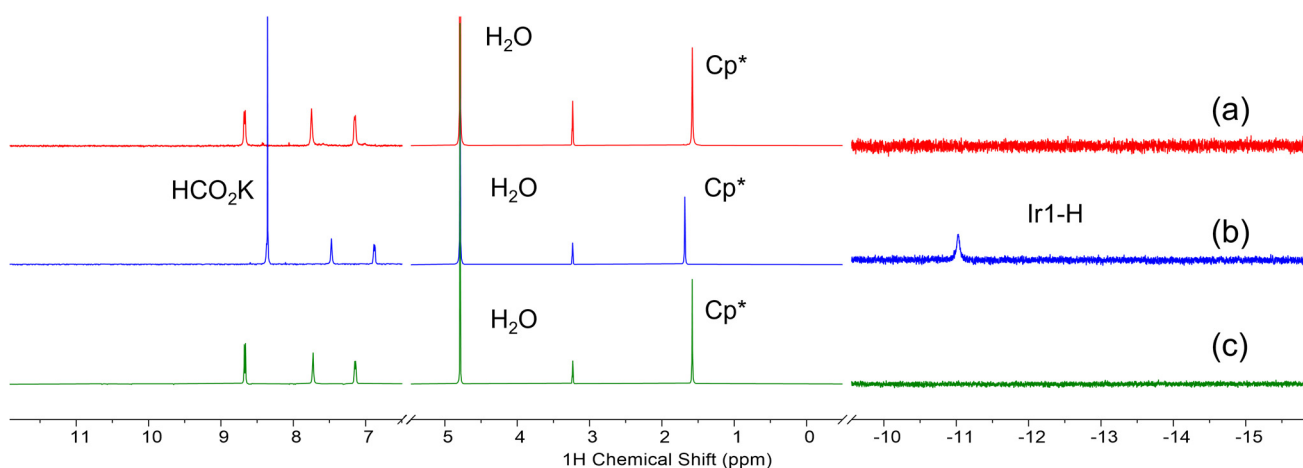

**Figure S3.**  $^1\text{H}$  NMR spectra of **Ir1** (expanded to 50 times for below -10 ppm and 10 times for above 7 ppm). (a) **Ir1** in  $\text{D}_2\text{O}/\text{CD}_3\text{OD}$  (7/3), (b) **Ir1** with 5 equiv. of  $\text{HCO}_2\text{K}$  in  $\text{D}_2\text{O}/\text{CD}_3\text{OD}$  (7/3), (c) Addition of 5 equiv. of  $\text{D}_2\text{SO}_4$  to (b).

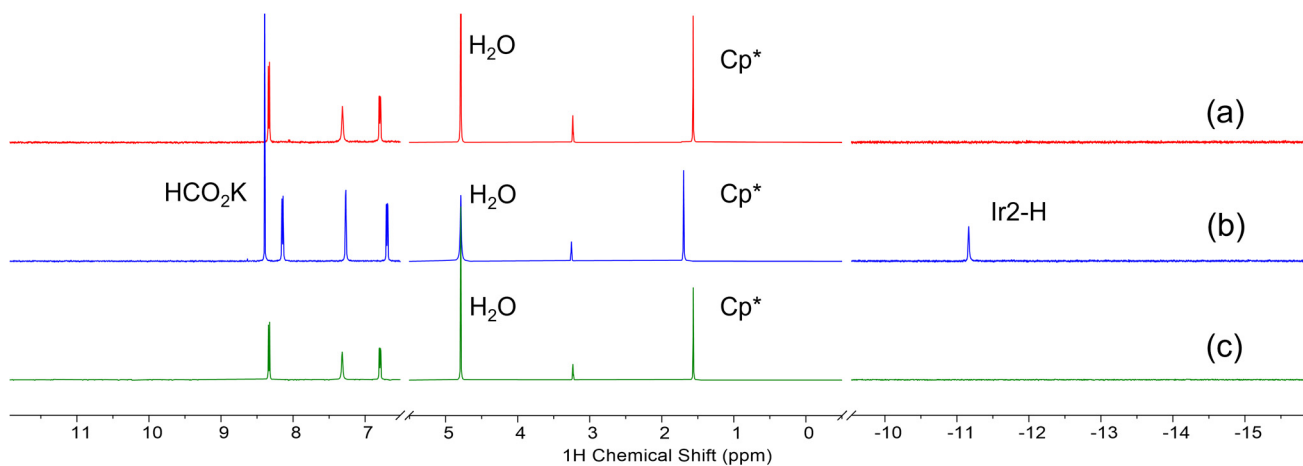

**Figure S4.**  $^1\text{H}$  NMR spectra of **Ir2** (expanded to 50 times for below -10 ppm and 10 times for above 7 ppm). (a) **Ir2** in  $\text{D}_2\text{O}/\text{CD}_3\text{OD}$  (7/3), (b) **Ir2** with 5 equiv. of  $\text{HCO}_2\text{K}$  in  $\text{D}_2\text{O}/\text{CD}_3\text{OD}$  (7/3), (c) Addition of 5 equiv. of  $\text{D}_2\text{SO}_4$  to (b).

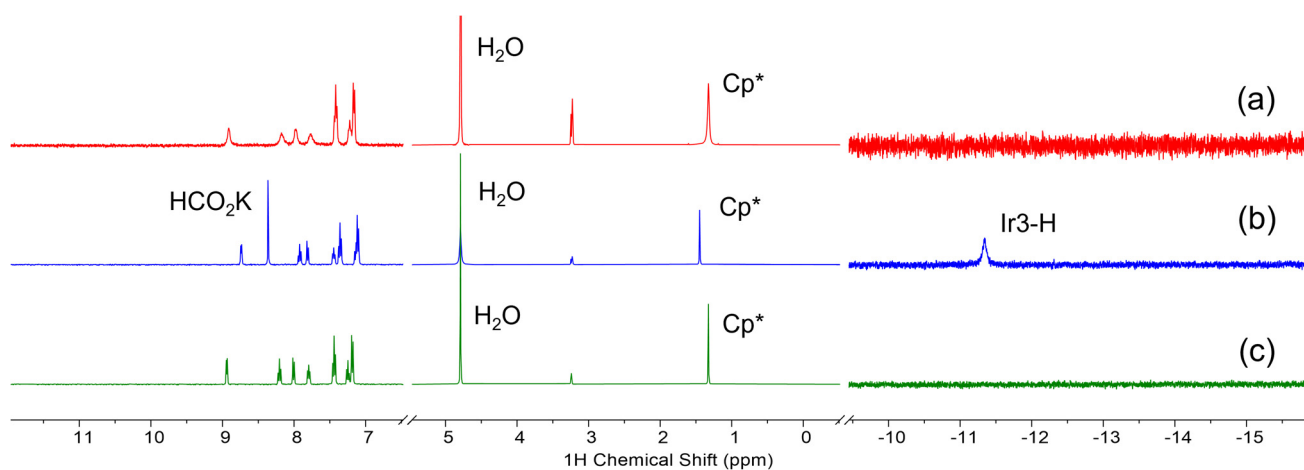

**Figure S5.**  $^1\text{H}$  NMR spectra of **Ir3** (expanded to 50 times for below -10 ppm and 10 times for above 7 ppm). (a) **Ir3** in  $\text{D}_2\text{O}/\text{CD}_3\text{OD}$  (7/3), (b) **Ir3** with 5 equiv. of  $\text{HCO}_2\text{K}$  in  $\text{D}_2\text{O}/\text{CD}_3\text{OD}$  (7/3), (c) Addition of 5 equiv. of  $\text{D}_2\text{SO}_4$  to (b).

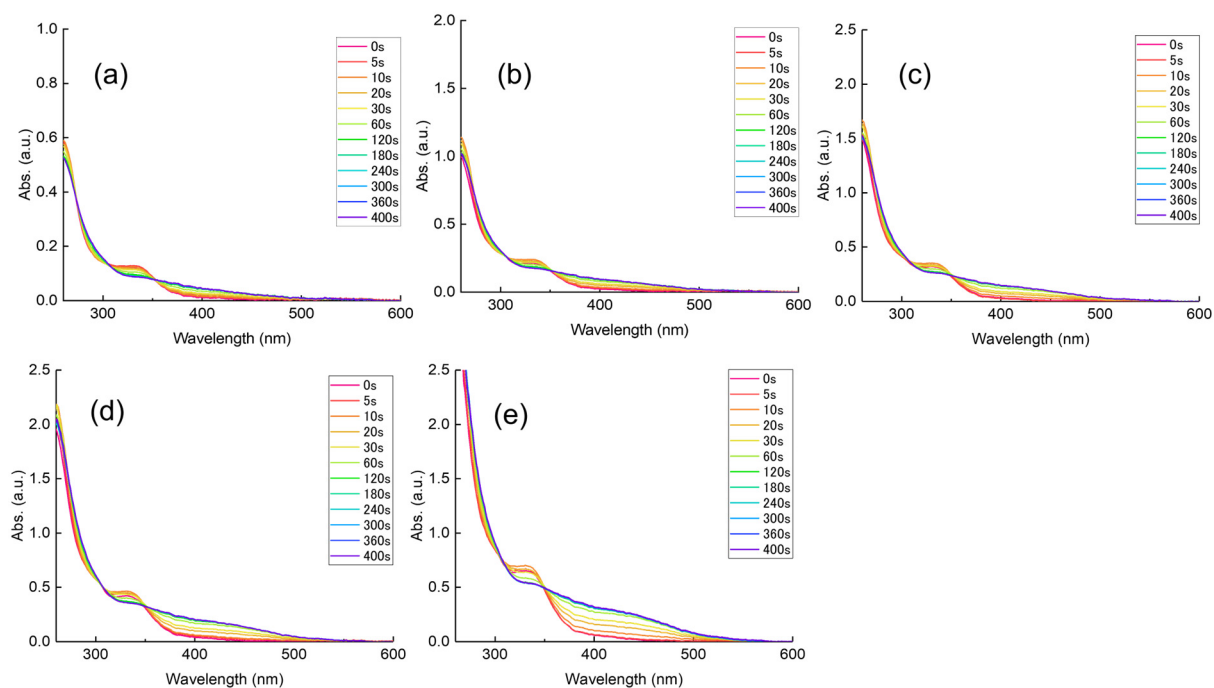

**Figure S6.** UV-vis spectra of **Ir1** with the addition of  $\text{HCO}_2\text{K}$ .

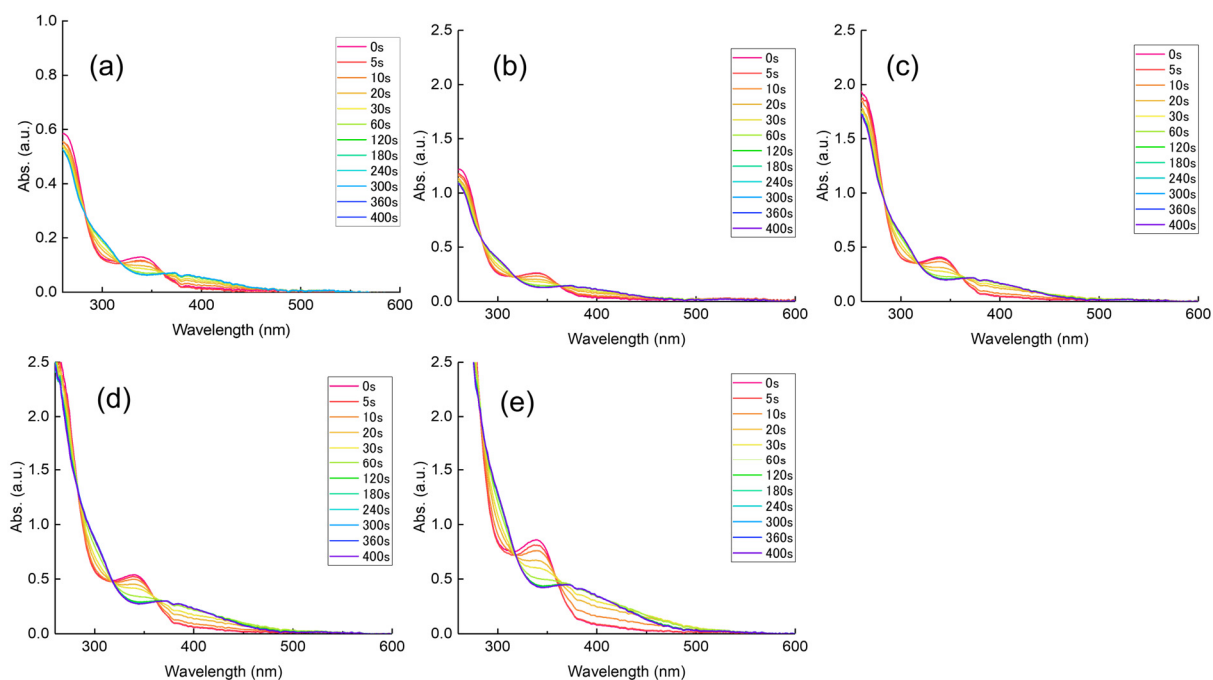

**Figure S7.** UV-vis spectra of Ir2 with the addition of HCO<sub>2</sub>K.

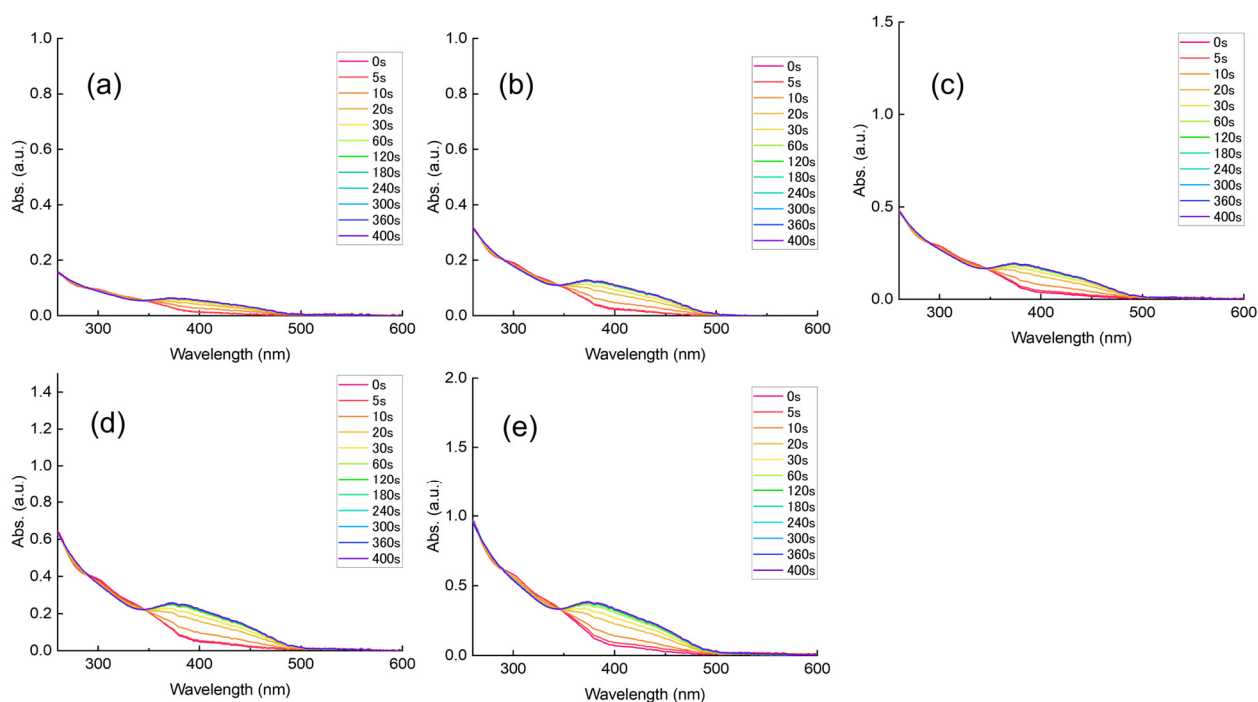

**Figure S8.** UV-vis spectra of Ir3 with the addition of HCO<sub>2</sub>K.

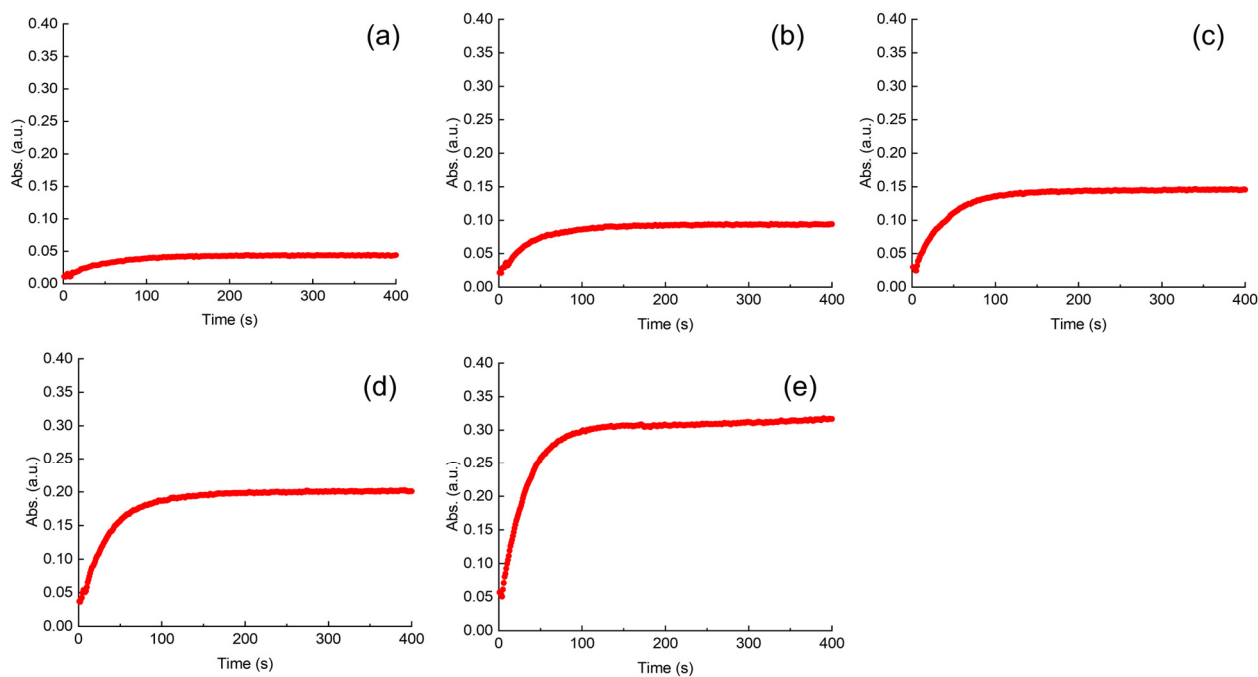

**Figure S9.** Time course of absorption at 400 nm with various concentration of Ir1.

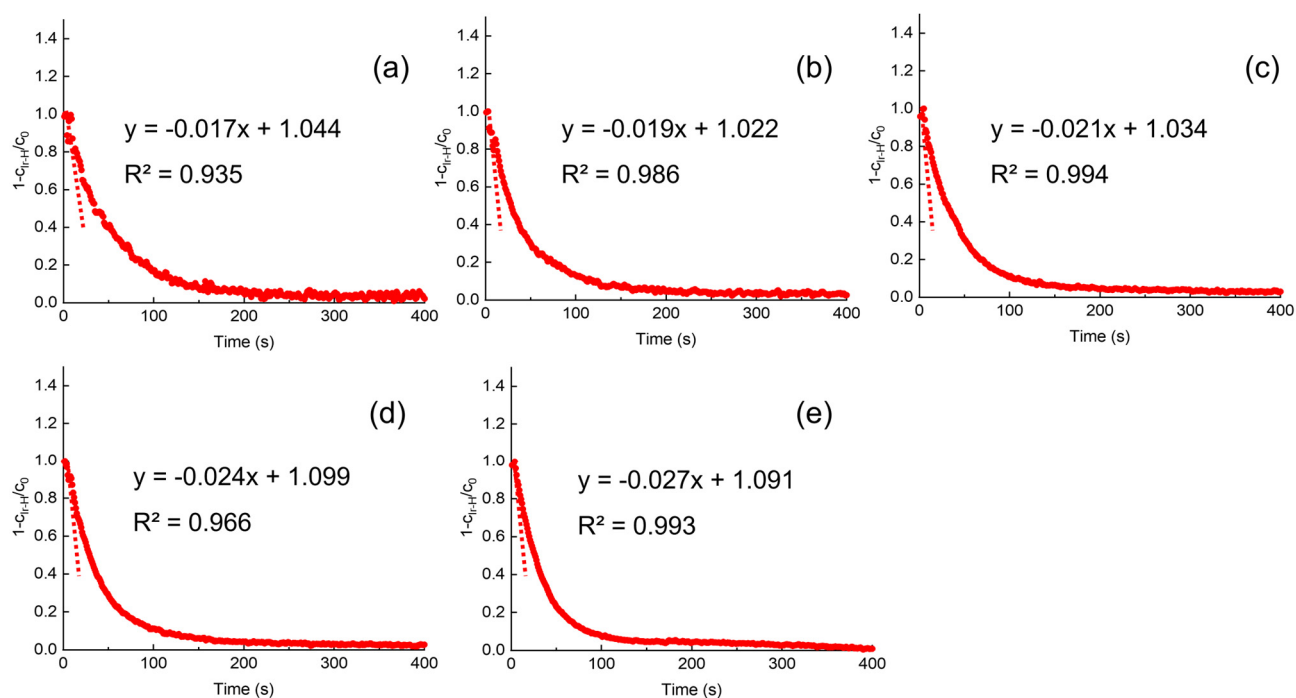

**Figure S10.** The initial hydride formation rates with various concentration of Ir1.

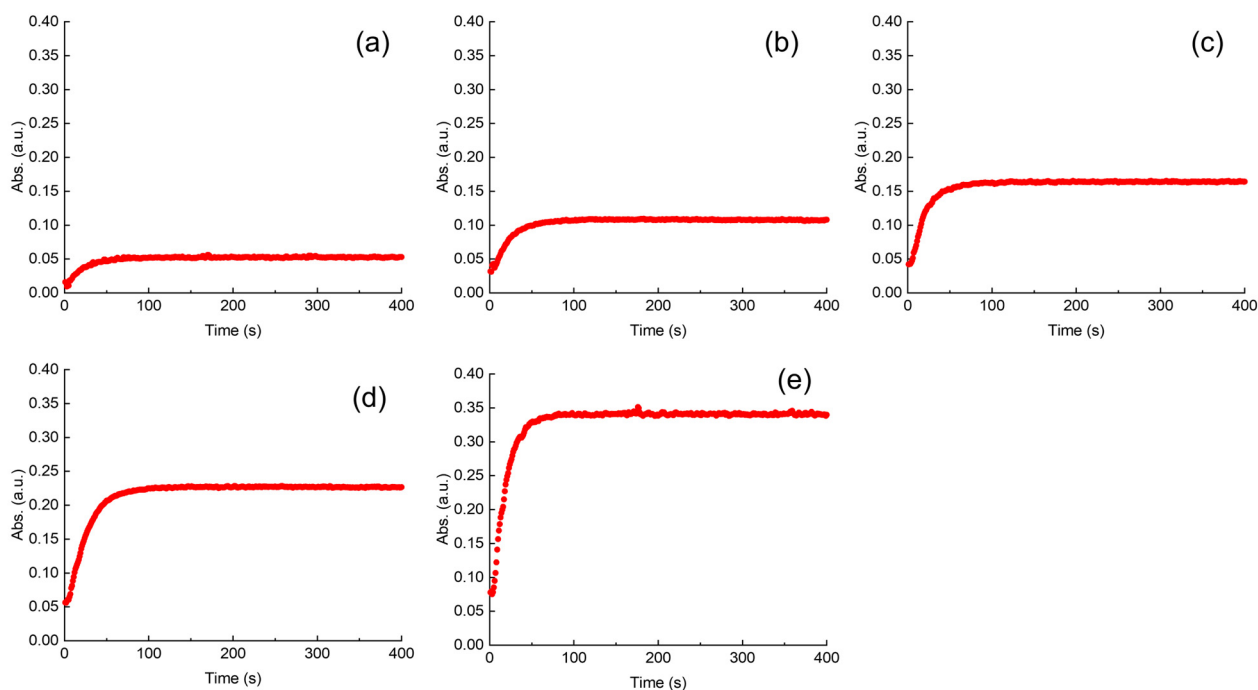

**Figure S11.** Time course of absorption at 400 nm with various concentration of Ir<sub>2</sub>.

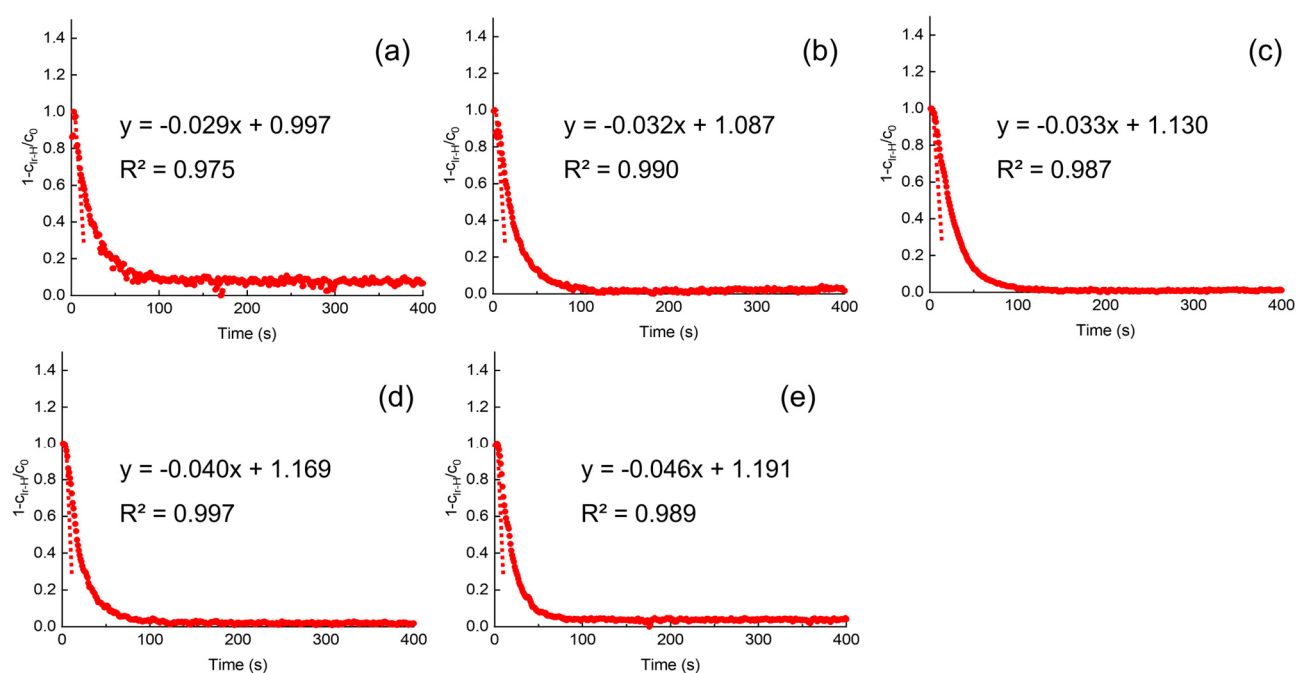

**Figure S12.** The initial hydride formation rates with various concentration of Ir<sub>2</sub>.

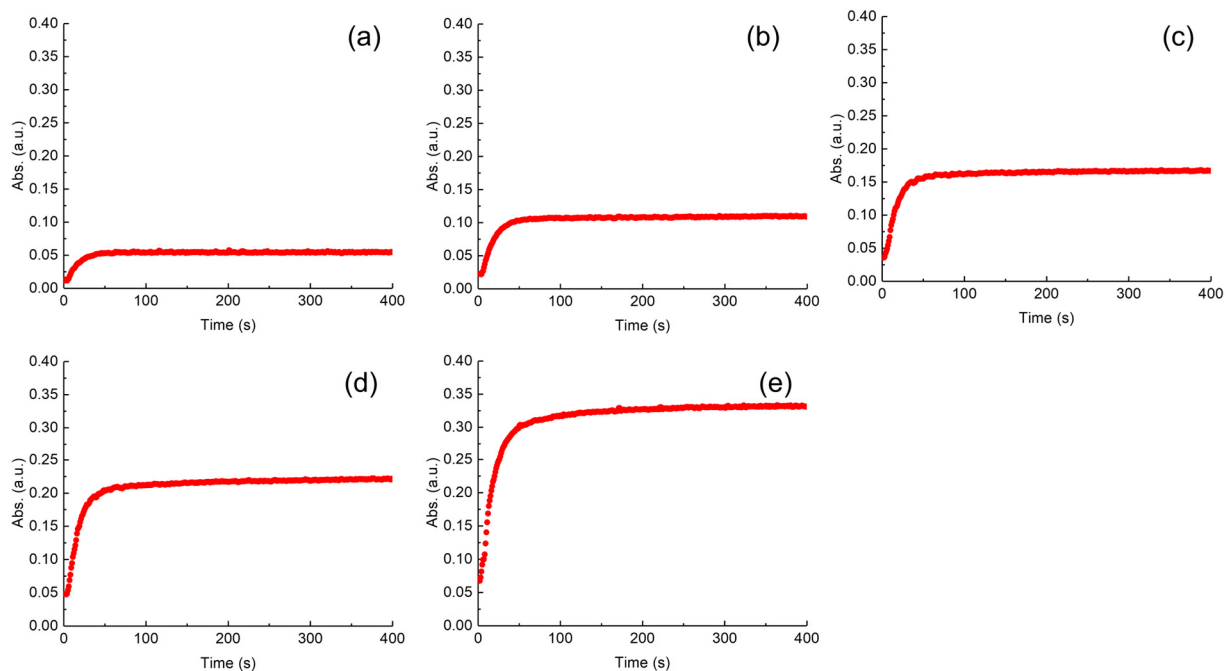

**Figure S13.** Time course of absorption at 400 nm with various concentration of  $\text{Ir}3$ .

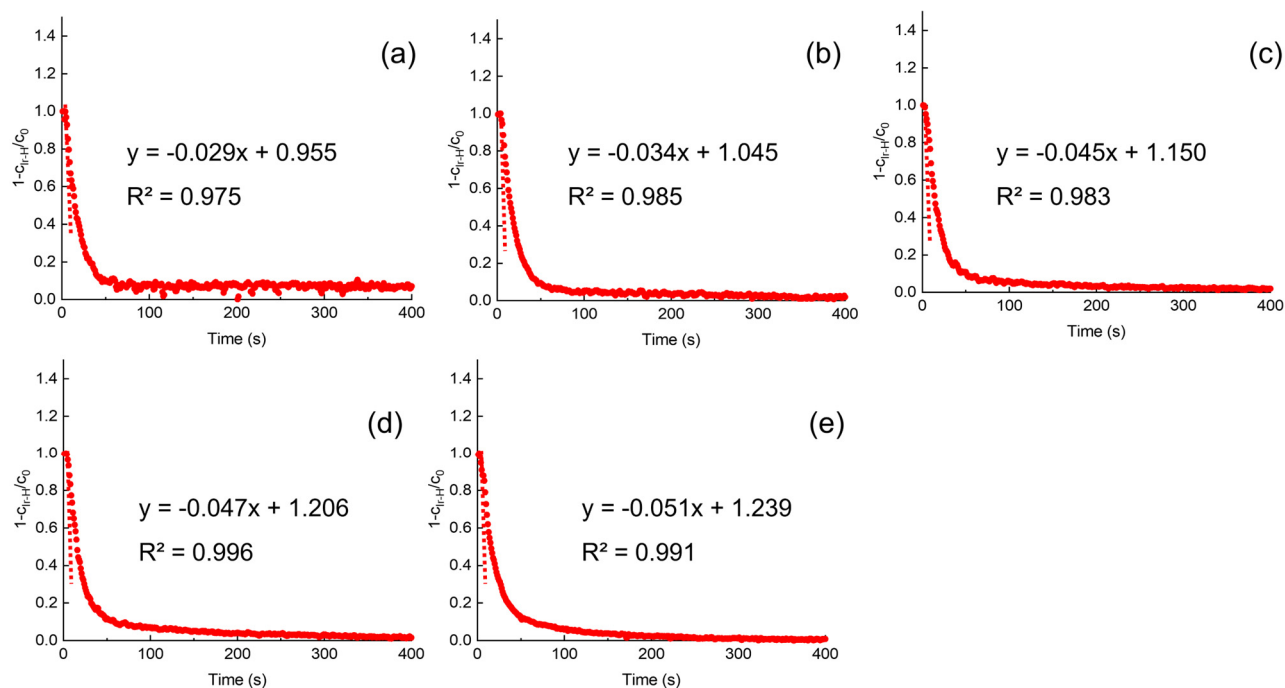

**Figure S14.** The initial hydride formation rates with various concentration of  $\text{Ir}3$ .

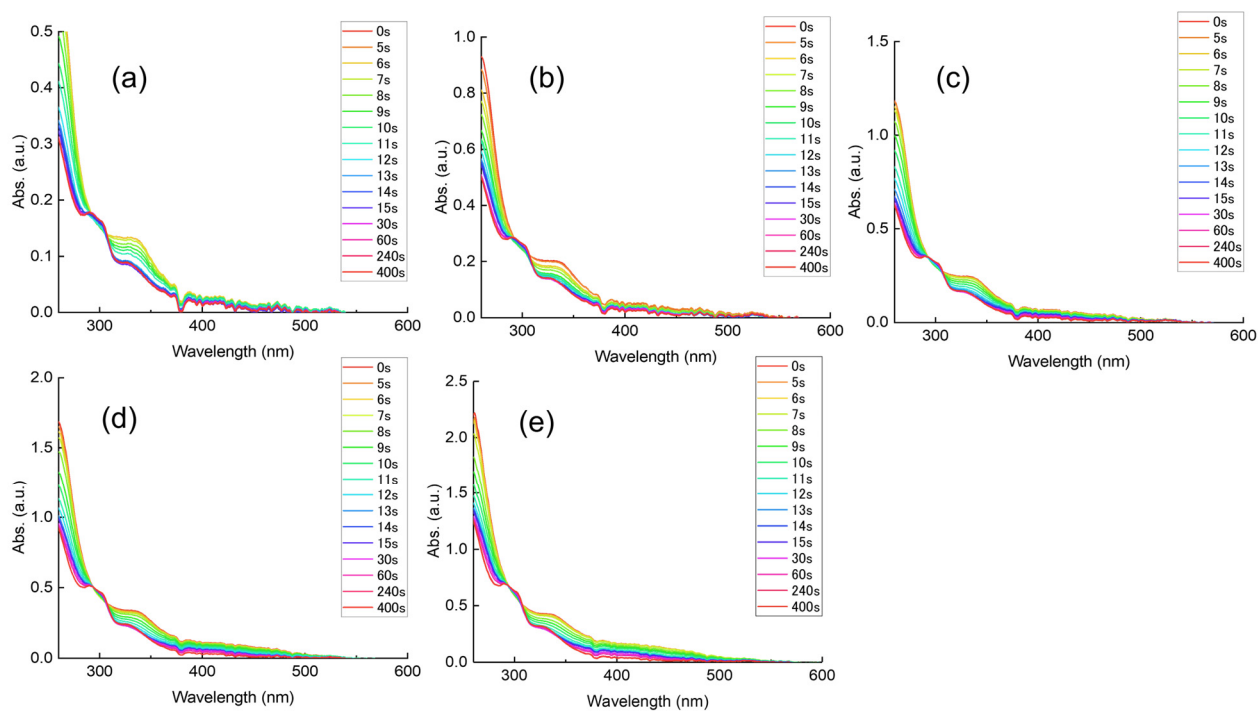

**Figure S15.** UV-vis spectra of Ir1 with the addition of HCO<sub>2</sub>K and H<sub>2</sub>SO<sub>4</sub>.

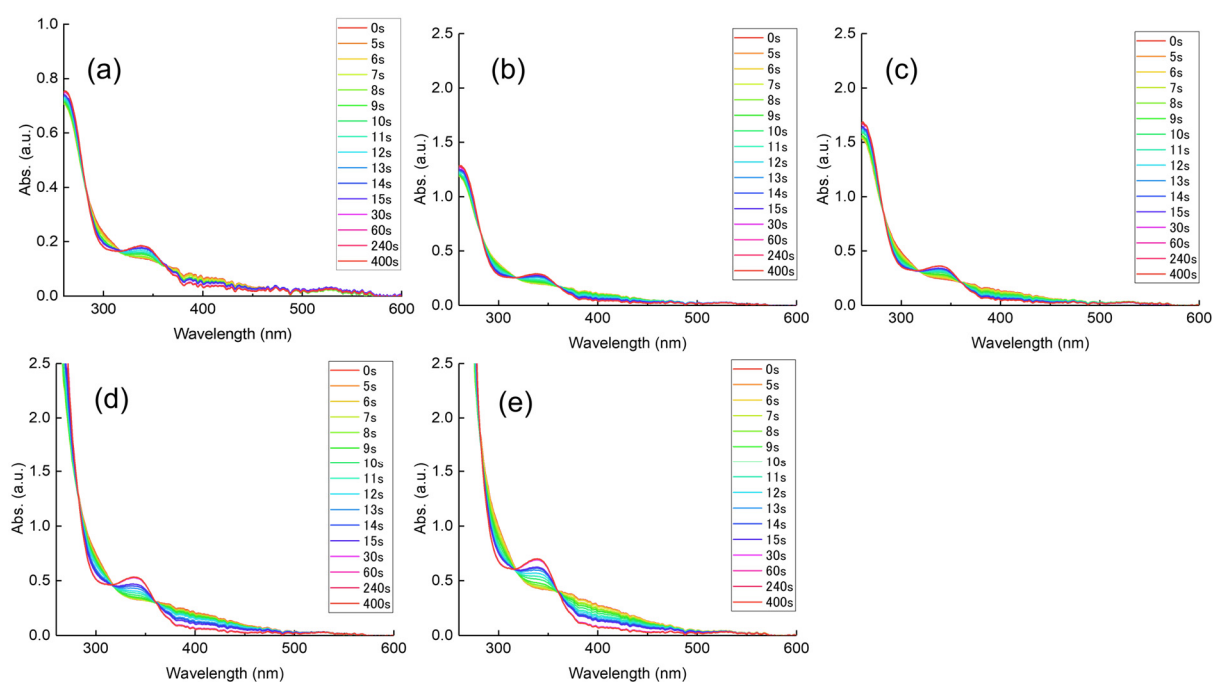

**Figure S16.** UV-vis spectra of Ir2 with the addition of HCO<sub>2</sub>K and H<sub>2</sub>SO<sub>4</sub>.

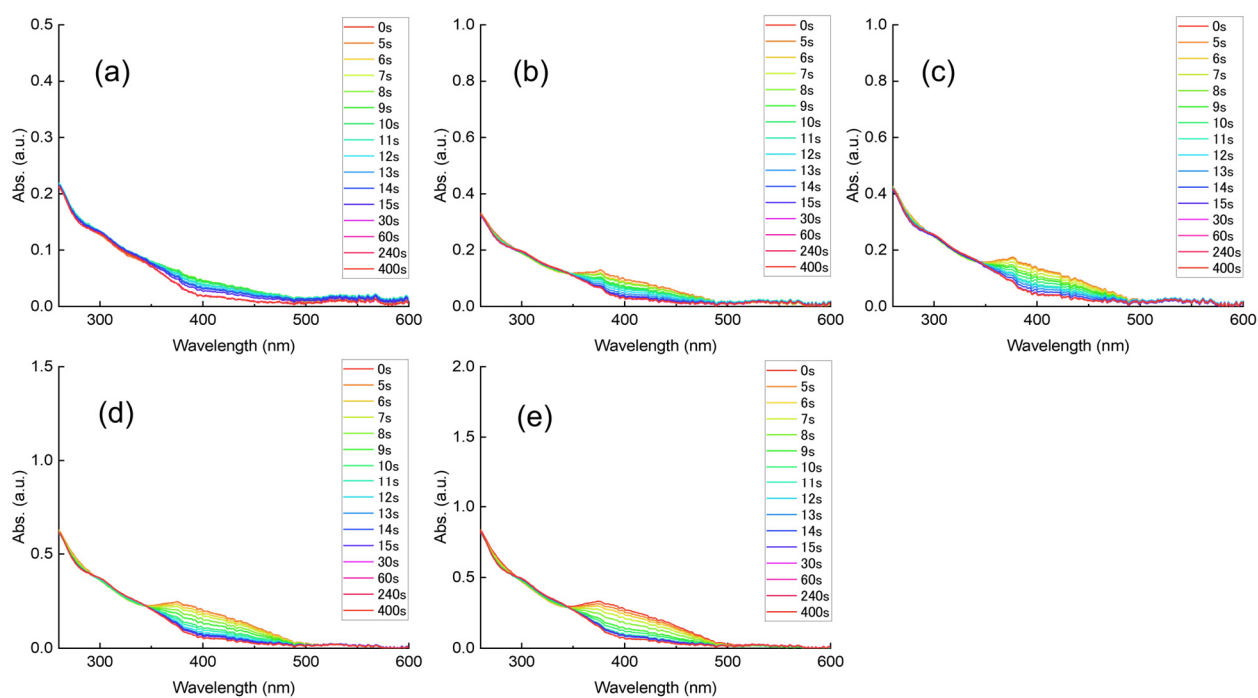

**Figure S17.** UV-vis spectra of Ir3 with the addition of HCO<sub>2</sub>K and H<sub>2</sub>SO<sub>4</sub>.

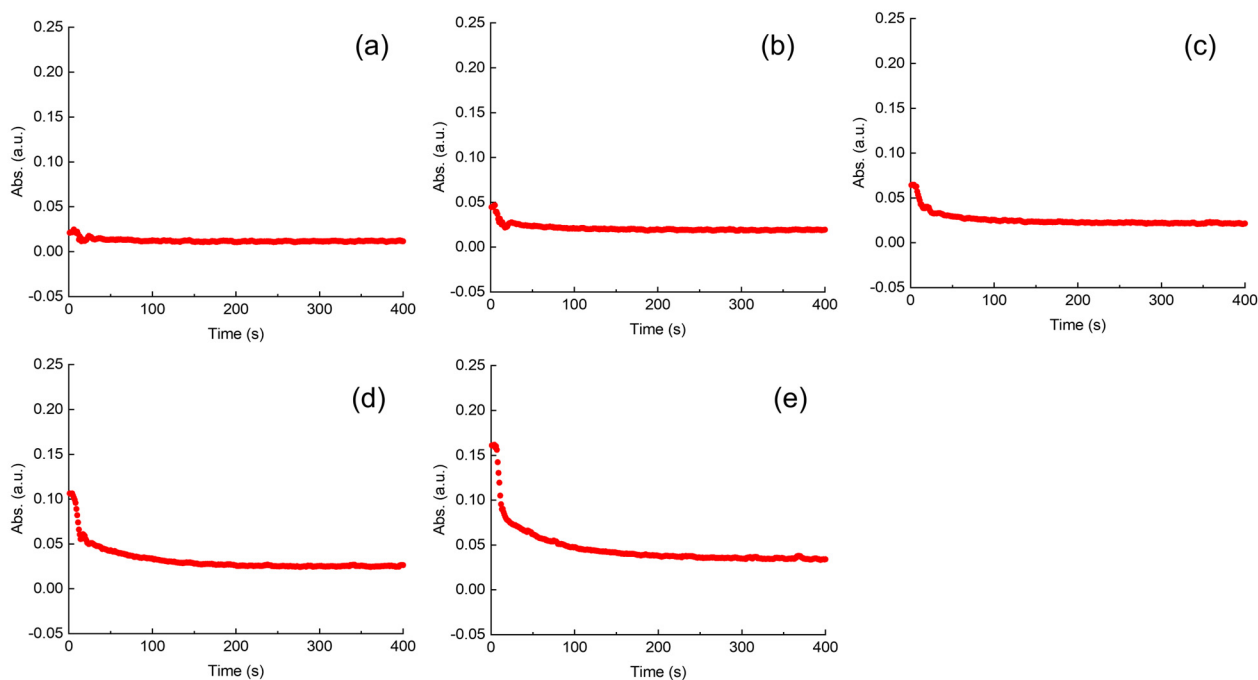

**Figure S18.** Time course of absorption at 400 nm with various concentration of Ir1.

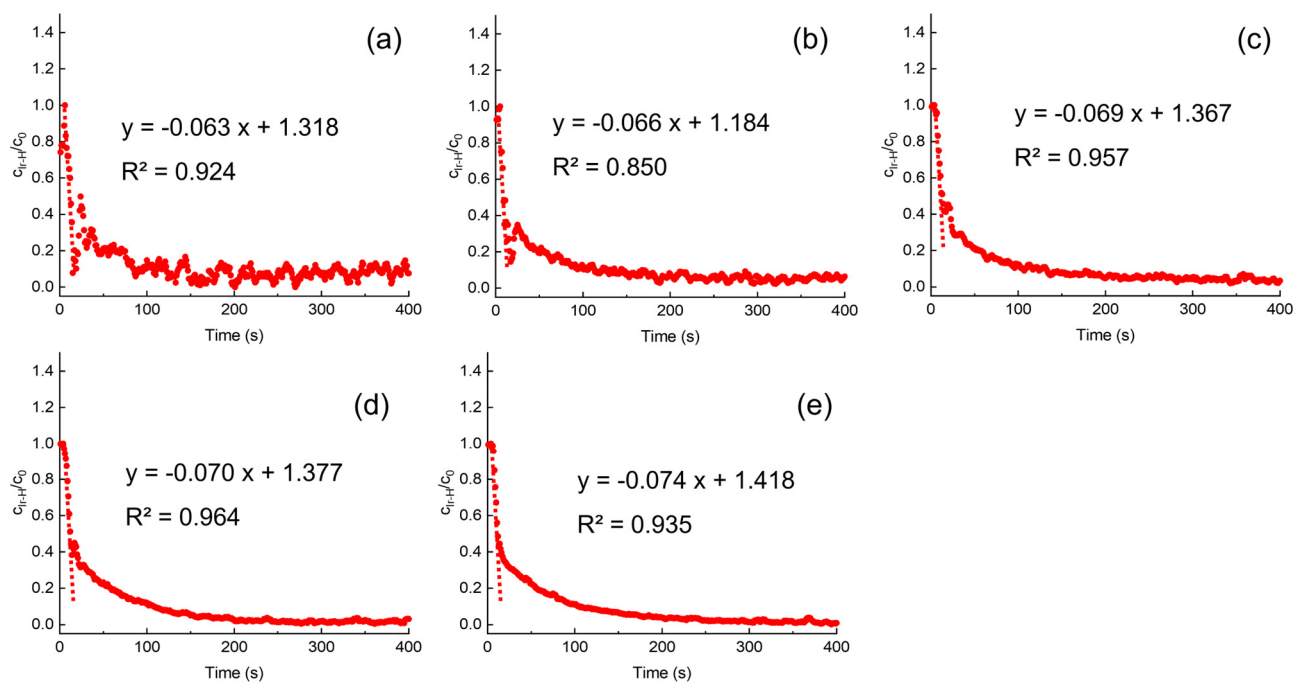

**Figure S19.** The initial  $H_2$  evolution rates with various concentration of Ir1.

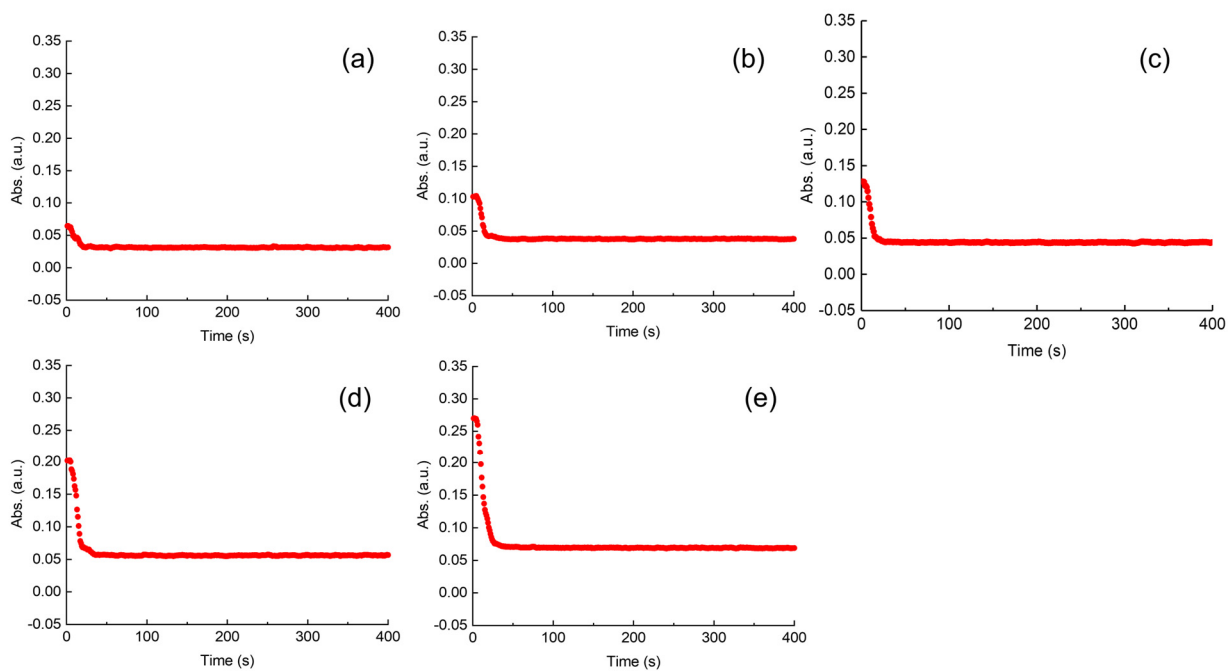

**Figure S20.** Time course of absorption at 400 nm with various concentration of Ir2.

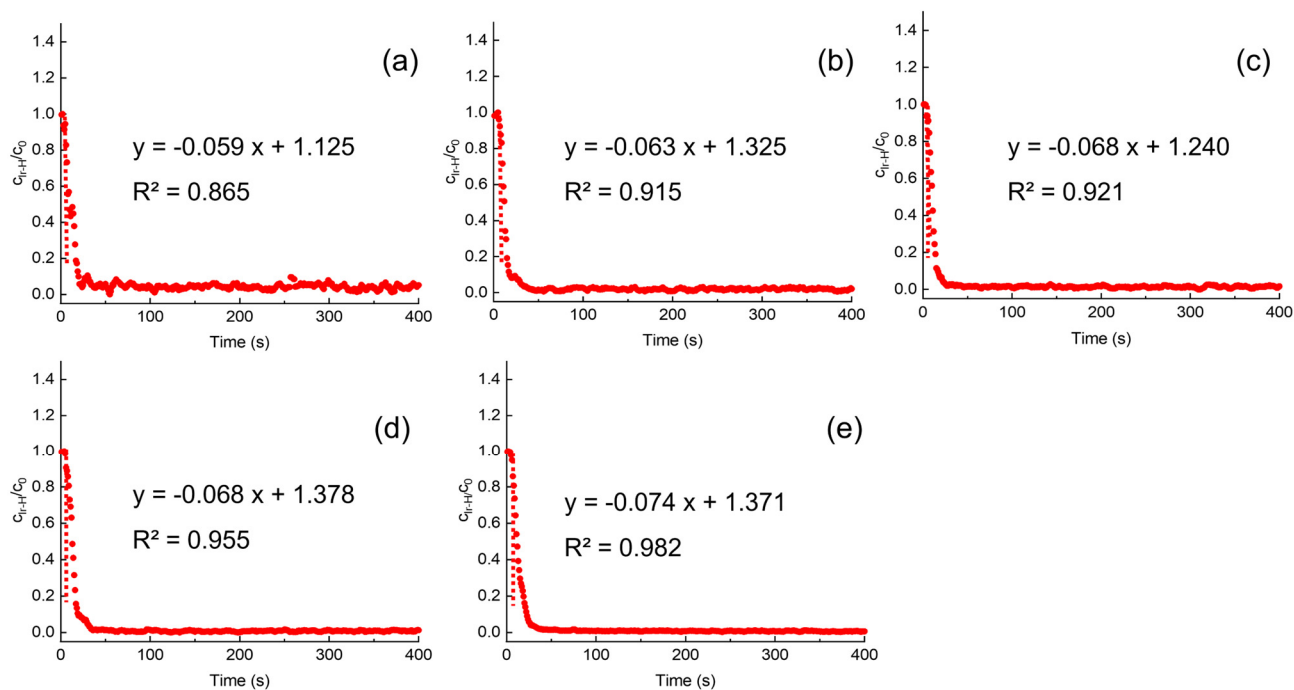

**Figure S21.** The initial  $H_2$  evolution rates with various concentration of Ir2.

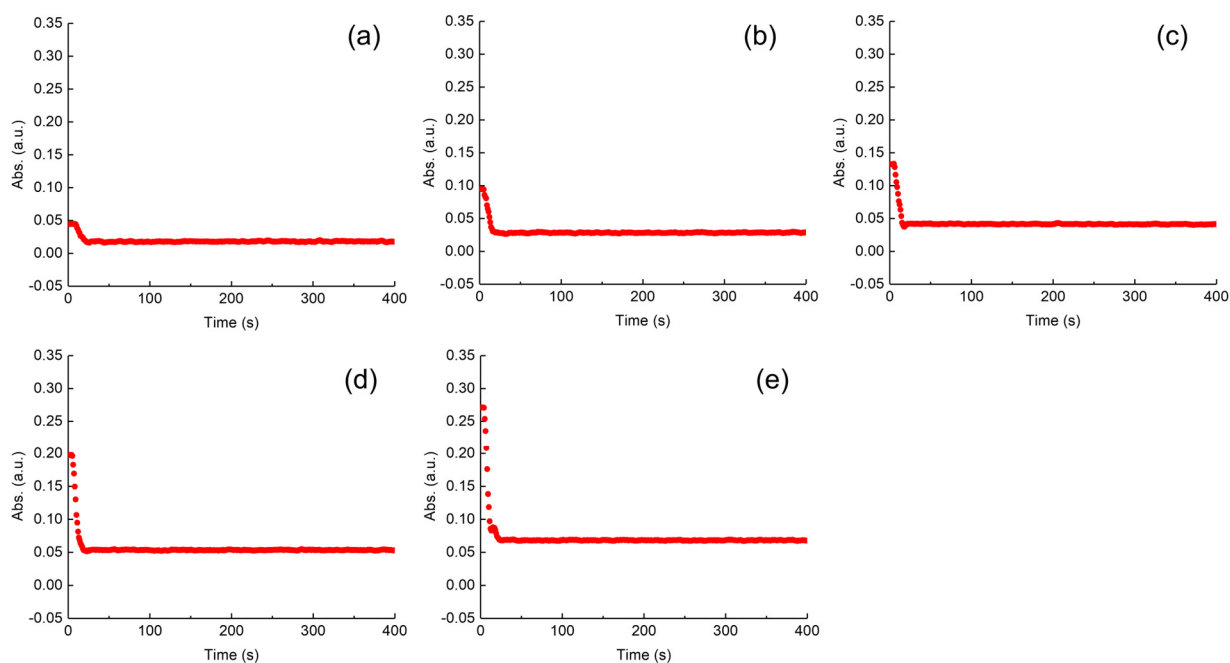

**Figure S22.** Time course of absorption at 400 nm with various concentration of Ir3.

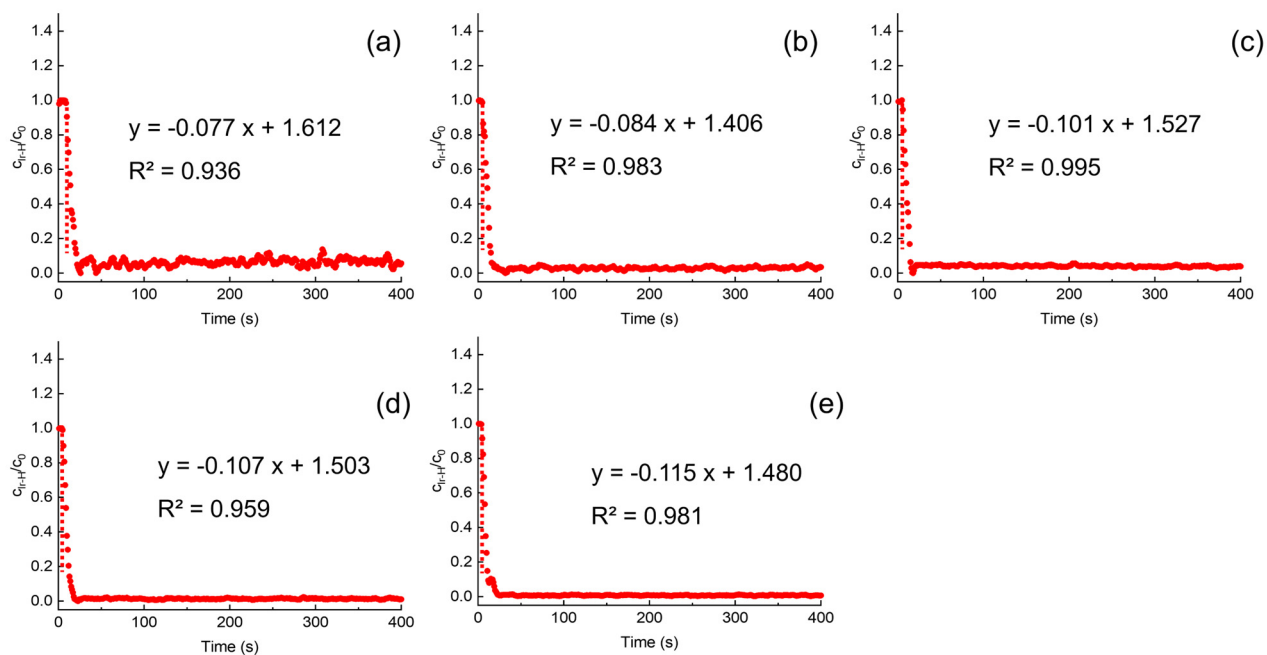

**Figure S23.** The initial  $H_2$  evolution rates with various concentration of **Ir3**.

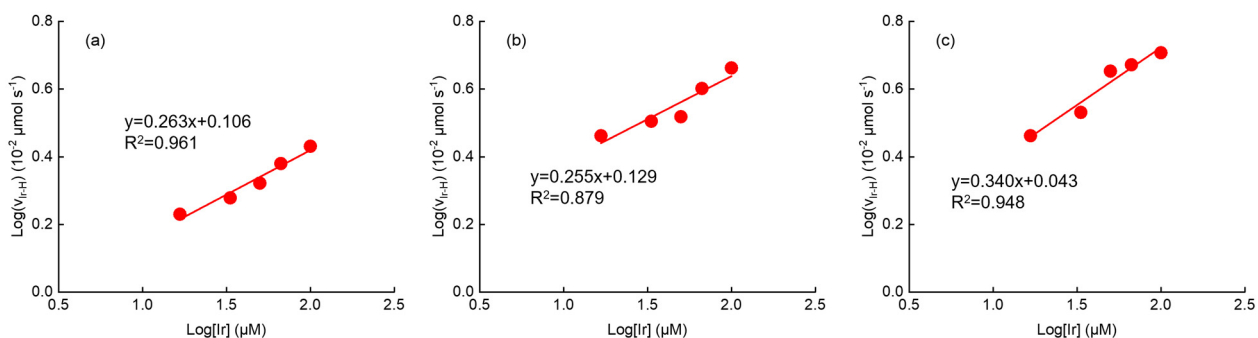

**Figure S24.** Reaction order of (a) **Ir1**, (b) **Ir2**, (c) **Ir3**.

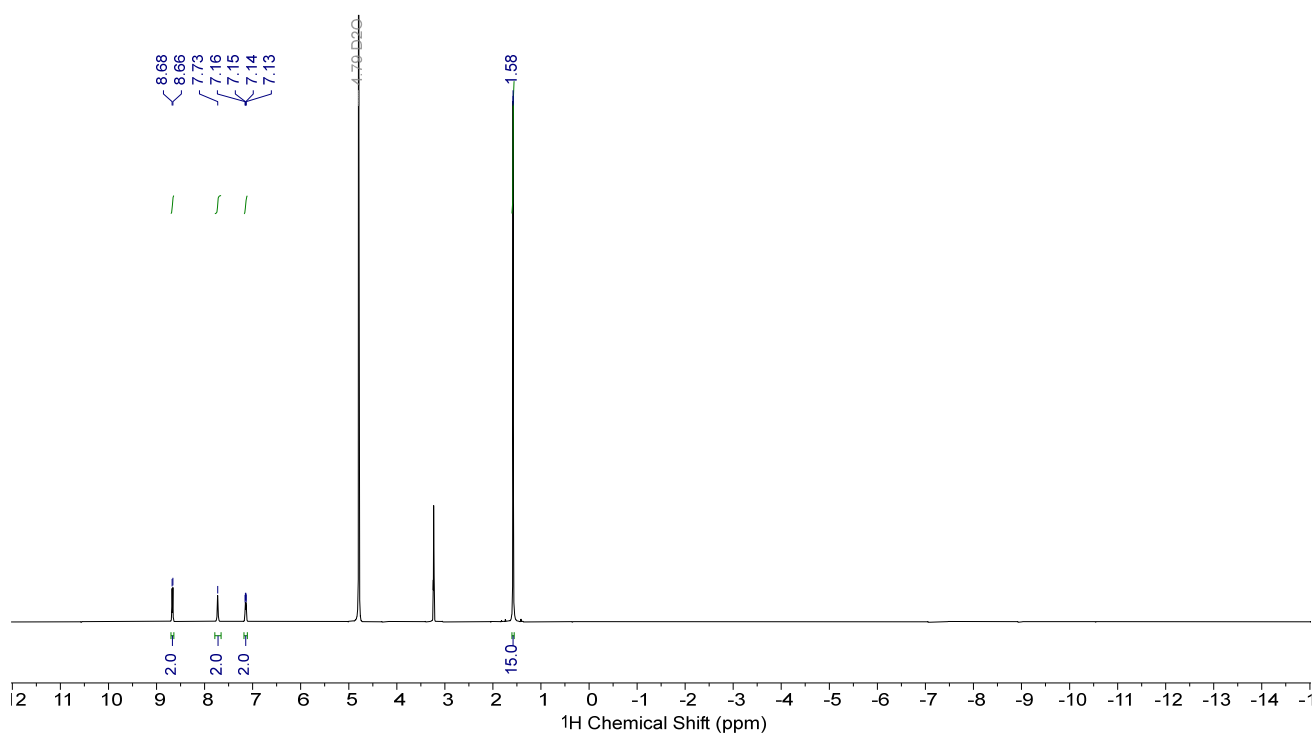

**Figure S25.** <sup>1</sup>H NMR of Ir1.

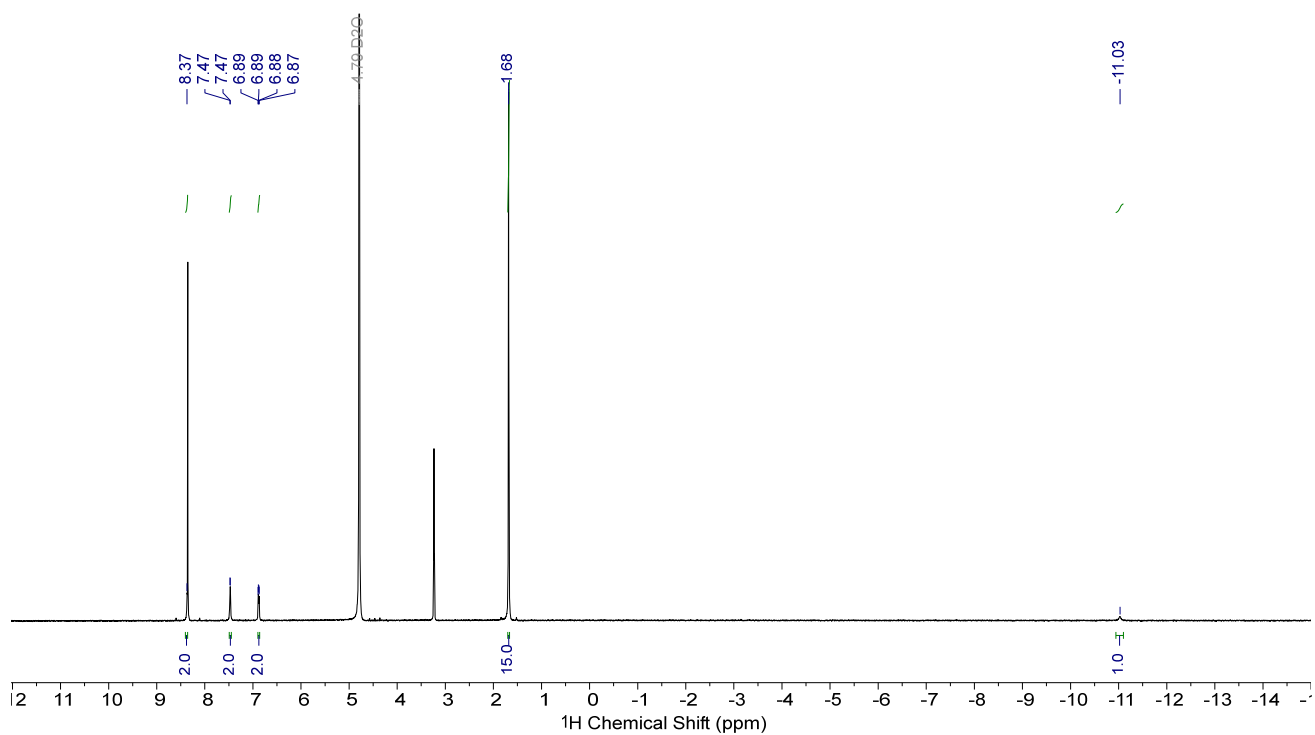

**Figure S26.** <sup>1</sup>H NMR of Ir1 with the addition of HCO<sub>2</sub>K.

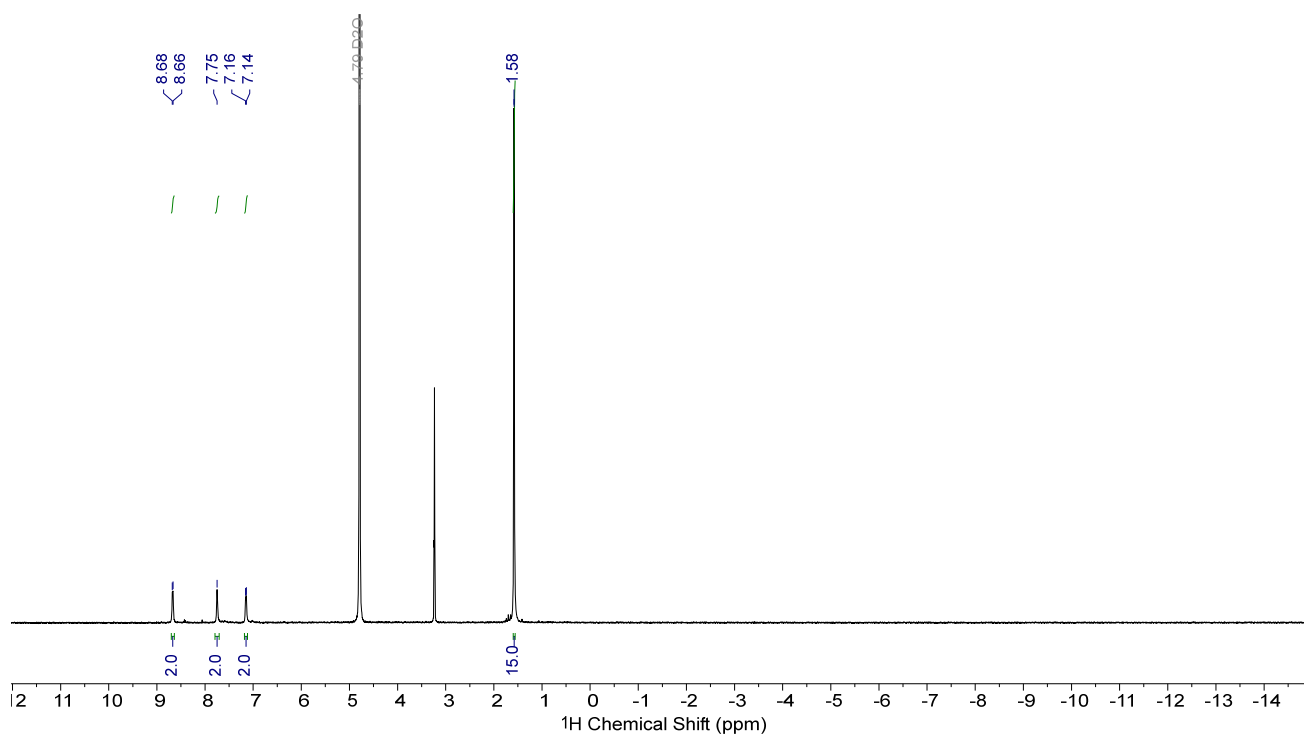

**Figure S27.** <sup>1</sup>H NMR of Ir1 with the addition of HCO<sub>2</sub>K and D<sub>2</sub>SO<sub>4</sub>.

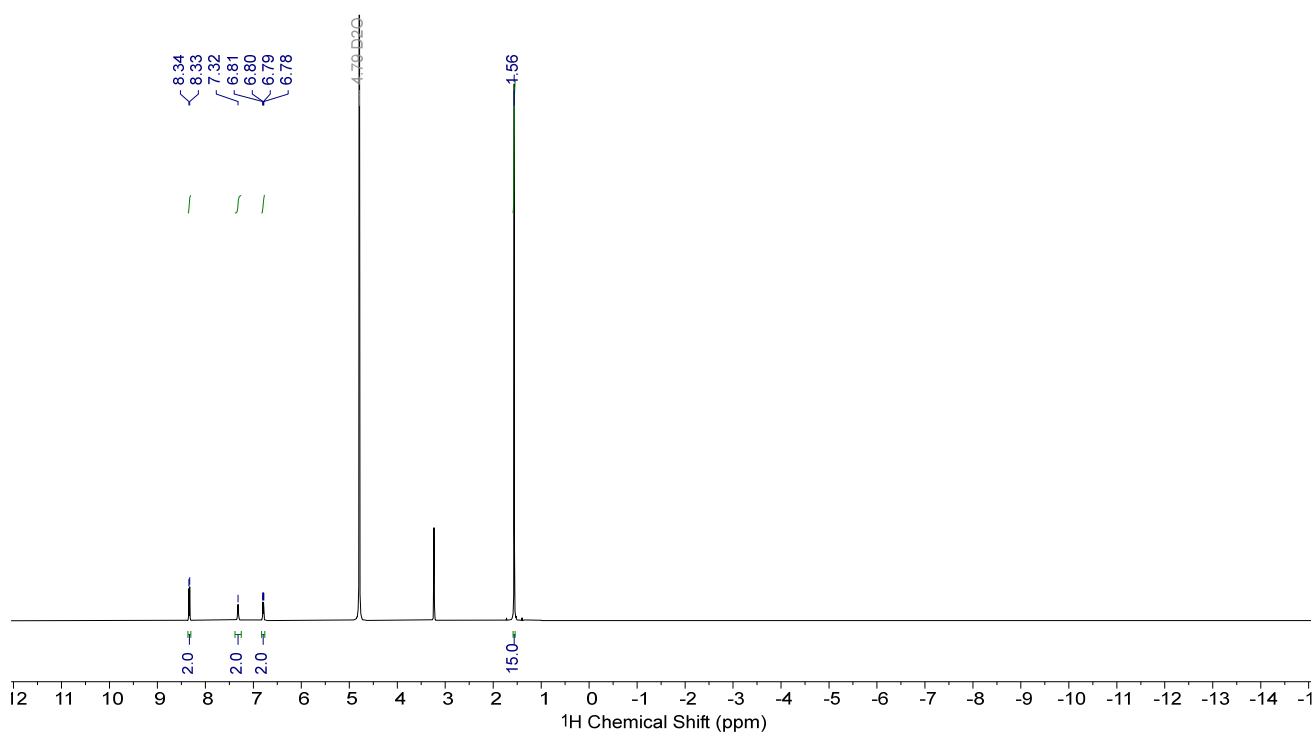

**Figure S28.** <sup>1</sup>H NMR of Ir2.

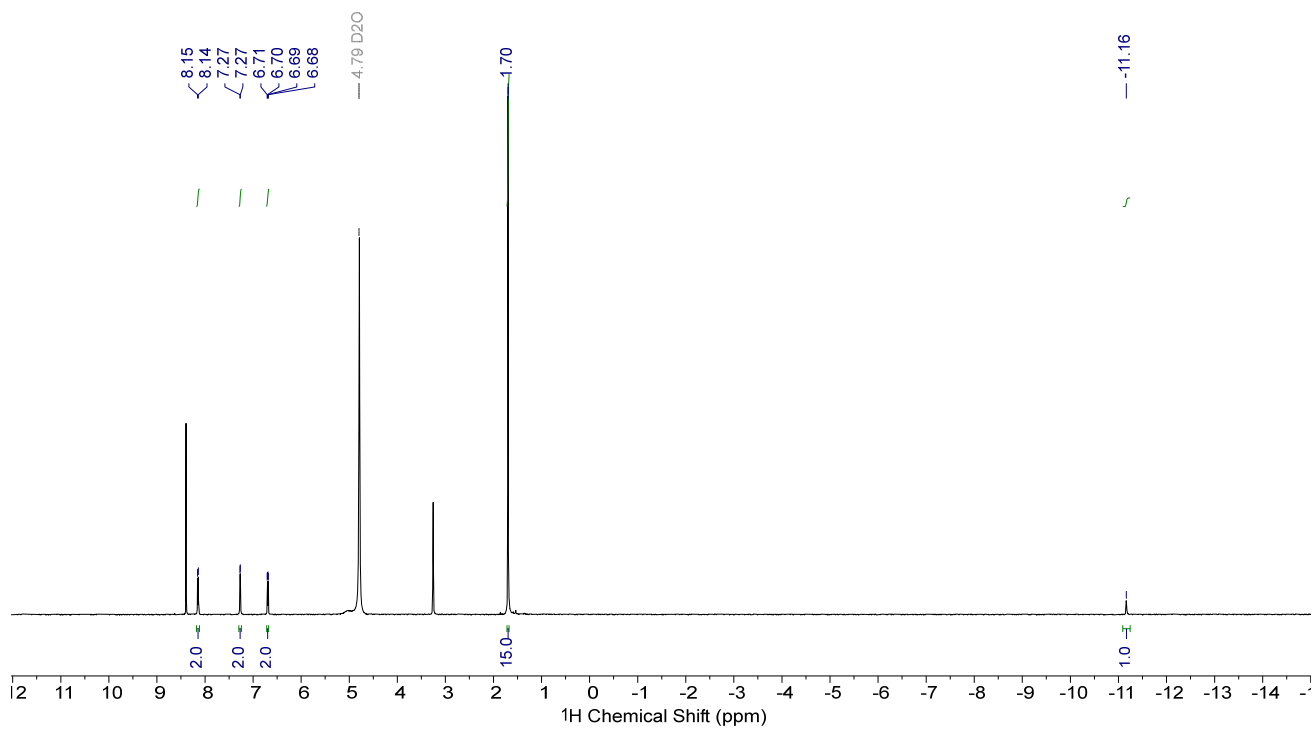

**Figure S29.** <sup>1</sup>H NMR of Ir2 with the addition of HCO<sub>2</sub>K.

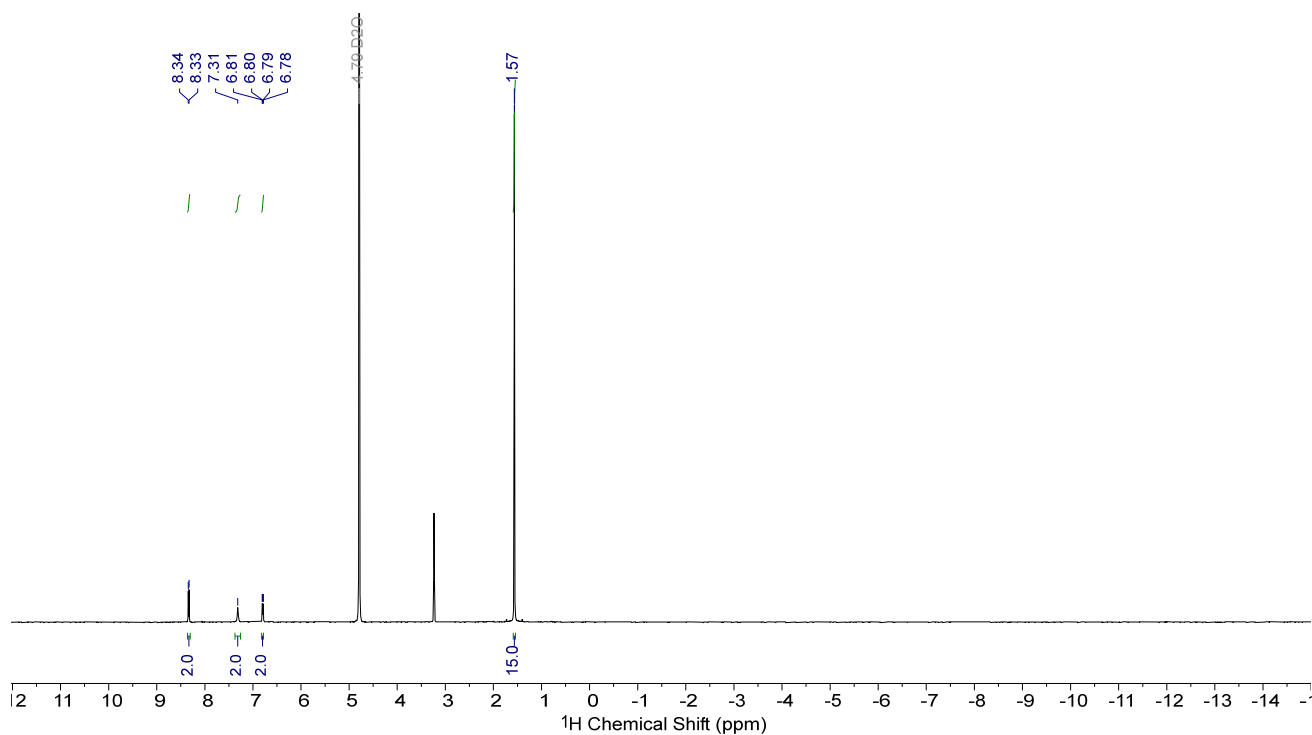

**Figure S30.** <sup>1</sup>H NMR of Ir2 with the addition of HCO<sub>2</sub>K and D<sub>2</sub>SO<sub>4</sub>.

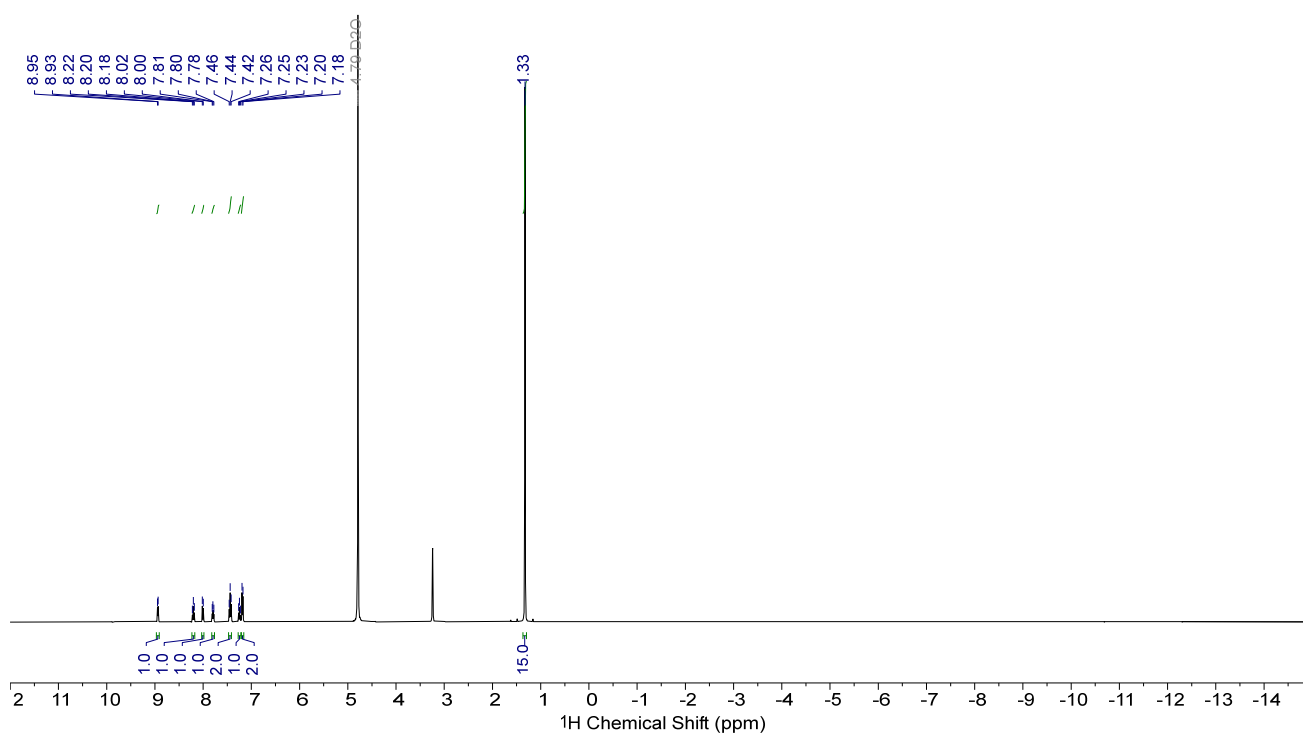

**Figure S31.** <sup>1</sup>H NMR of Ir3.

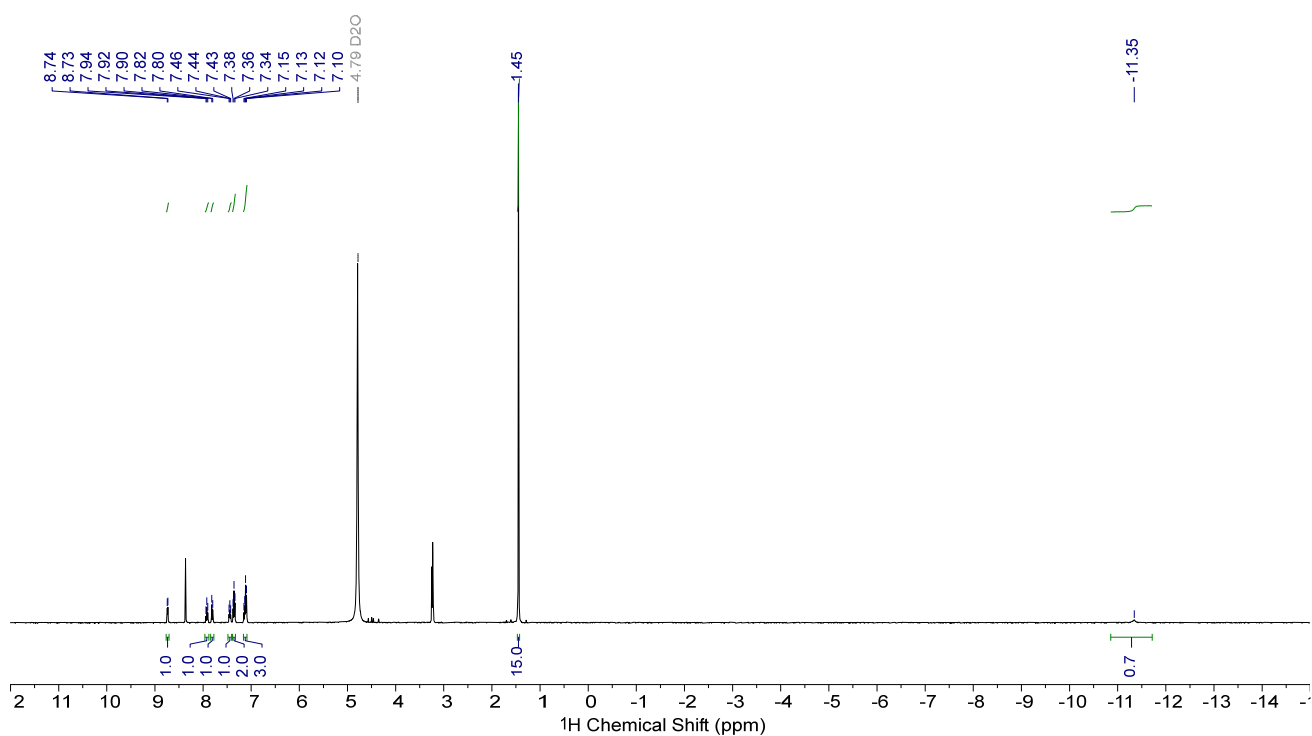

**Figure S32.** <sup>1</sup>H NMR of Ir3 with the addition of HCO<sub>2</sub>K.

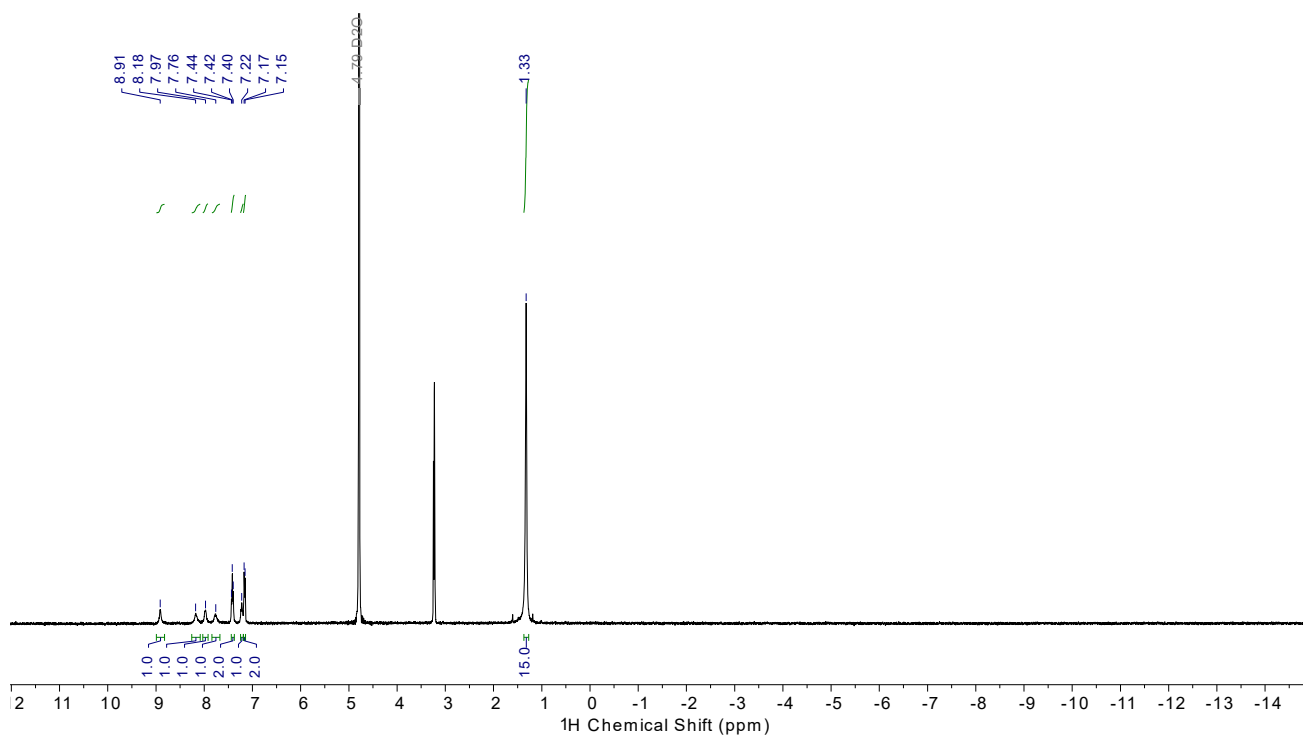

**Figure S33.**  $^1\text{H}$  NMR of **Ir3** with the addition of  $\text{HCO}_2\text{K}$  and  $\text{D}_2\text{SO}_4$ .

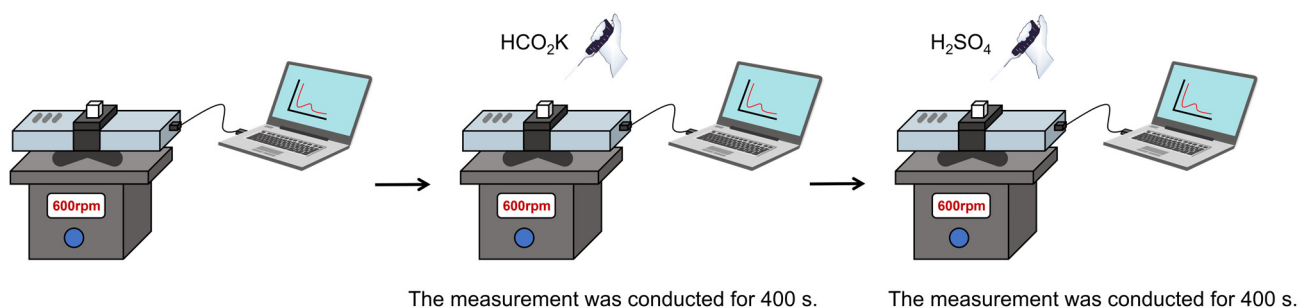

**Figure S34.** Schematic of in-situ UV-Vis spectroscopic analysis setup. UV-vis spectra were recorded at 25 °C on SEC2000 spectrometer with a charge coupled device array detector (ALS Co., Ltd). The solution was stirred at 600 rpm using a magnetic stirrer.
